# Supplementary material
Source: PubMed Central journal article supplement (PMC129364)
Supplement: pnas_182376299_1.pdf [file pnas_182376299_1.pdf]

Table 1.  
ARGs in LNCaP Cells with  $\geq$  or  $\leq$  3-Fold Expression Change

| Gene                                           | $\Delta$ Fold<br>24hr | 48hr | Accession | Description                                           |
|------------------------------------------------|-----------------------|------|-----------|-------------------------------------------------------|
| <b>Metabolism</b>                              |                       |      |           |                                                       |
| HPGD                                           | 25.0                  | 41.3 | NM_000860 | hydroxyprostaglandin dehydrogenase                    |
| PPAP2A                                         | 7.6                   | 9.0  | NM_003711 | phosphatidic acid phosphatase 2A                      |
| SCD                                            | 5.9                   | 4.5  | NM_005063 | stearoyl-CoA desaturase                               |
| SORD                                           | 4.5                   | 5.4  | NM_003104 | sorbitol dehydrogenase                                |
| DHCR24                                         | 4.5                   | 6.0  | NM_014762 | 24-dehydrocholesterol reductase/Seladin               |
| SMS                                            | 3.9                   | 5.8  | NM_004595 | spermine synthase                                     |
| LOC51171                                       | 3.7                   | 3.6  | NM_016246 | dehydrogenase/reductase retSDR3                       |
| ALDH1A3                                        | 3.7                   | 5.2  | NM_000693 | aldehyde dehydrogenase 1, member A3                   |
| SAT                                            | 3.7                   | 7.3  | NM_002970 | spermidine/spermine N1-acetyltransferase              |
| HMGCS1                                         | 3.5                   | 2.7  | NM_002130 | 3-hydroxy-3-methylglutaryl-Coenzyme A syn 1           |
| DBI                                            | 3.4                   | 4.0  | NM_020548 | diazepam binding inhibitor                            |
| B4GALT1                                        | 3.3                   | 3.3  | NM_001497 | betaGlcNAc beta 1,4- galactosyltransferase            |
| PHYH                                           | 3.1                   | 4.4  | NM_06214  | phytanoyl-CoA hydroxylase                             |
| IDI1                                           | 3.1                   | 2.7  | NM_004508 | isopentenyl-diphosphate delta isomerase               |
| HELO1                                          | 3.0                   | 3.2  | NM_021814 | long chain polyunsaturated FA elongation              |
| UGDH                                           | 2.9                   | 4.0  | NM_003359 | UDP-glucose dehydrogenase                             |
| FACL3                                          | 2.7                   | 3.7  | NM_004457 | fatty-acid-Coenzyme A ligase, long-chain 3            |
| DDC                                            | -2.6                  | -4.1 | NM_000790 | dopa decarboxylase                                    |
| <b>Proliferation/differentiation/apoptosis</b> |                       |      |           |                                                       |
| MAF                                            | 14.7                  | 16.6 | NM_005360 | v-maf fibrosarcoma oncogene homolog                   |
| NDRG1                                          | 13.7                  | 14.8 | NM_006096 | N-myc downstream regulated                            |
| ELL2                                           | 11.8                  | 6.3  | NM_012081 | RNA Polymerase II, elongation factor                  |
| GG2-1                                          | 4.9                   | 5.1  | NM_014350 | TNF-induced protein                                   |
| CDC14                                          | 3.0                   | 3.1  | NM_003671 | cell division cycle 14 homolog B                      |
| B                                              | 2.5                   | 3.5  | NM_002166 | inhibitor of differentiation 2                        |
| ID2                                            | 1.6                   | 3.8  | NM_018645 | Hes6 neuronal differentiation gene ortholog           |
| HES6                                           | -3.4                  | -3.5 | NM_001328 | C-terminal binding protein 1                          |
| CTBP1                                          | -3.6                  | -3.4 | NM_001260 | cyclin-dependent kinase 8                             |
| CDK8                                           | -3.7                  | -5.1 | NM_000465 | BRCA1 associated RING domain 1                        |
| <b>Transport/trafficking</b>                   |                       |      |           |                                                       |
| FKBP5                                          | 24.4                  | 25.4 | NM_004117 | FK506 binding protein 5                               |
| UNC13                                          | 7.3                   | 9.5  | NM_006377 | unc-13-like (C. elegans)                              |
| ABCC4                                          | 5.5                   | 7.8  | NM_005845 | ATP-binding cassette, sub-family C                    |
| ANKH                                           | 5.3                   | 6.3  | NM_019847 | ankylosis, progressive (mouse) homolog                |
| KIAA1382                                       | 4.8                   | 4.7  | NM_018976 | amino acid transporter 2                              |
| SNAP25                                         | 3.9                   | 5.2  | NM_003081 | synaptosomal-associated protein, 25kD                 |
| APPBP2                                         | 3.2                   | 3.0  | NM_006380 | amyloid beta precursor protein binding protein 2      |
| AZGP1                                          | 3.3                   | 5.6  | NM_001185 | alpha-2-glycoprotein 1, zinc                          |
| LMAN1                                          | 3.1                   | 2.7  | NM_005570 | lectin, mannose-binding, 1                            |
| RAB4                                           | 3.0                   | 2.3  | NM_004578 | member, Ras oncogene family                           |
| SRP19                                          | 3.0                   | 2.3  | NM_003135 | signal recognition particle 19kD                      |
| SLC26A2                                        | 3.0                   | 2.2  | NM_000112 | solute carrier family 26, member 2                    |
| SEC24D                                         | 3.0                   | 2.6  | NM_014822 | SEC24 related gene family, member D                   |
| VAPA                                           | 2.7                   | 4.0  | NM_003574 | vesicle-associated membrane protein-associated        |
| SCNN1A                                         | -3.2                  | -2.5 | NM_001038 | sodium channel, nonvoltage-gated 1 alpha              |
| SLC29A                                         | -5.1                  | -2.1 | NM_004955 | solute carrier family 29                              |
| <b>Transcription regulation</b>                |                       |      |           |                                                       |
| NKX3A                                          | 14.9                  | 14.1 | NM_006167 | NK3 transcription factor homolog A (Drosophila)       |
| PDEF                                           | 4.4                   | 3.5  | NM_012391 | prostate epithelium-specific Ets transcription factor |
| RINZF                                          | 4.0                   | 3.2  | NM_023929 | zinc finger protein RINZF                             |
| DDXB1                                          | 3.9                   | 3.4  | NM_016166 | DEAD/H (Asp-Glu-Ala-Asp/His) box binding protein 1    |
| TSC22                                          | 3.5                   | 5.4  | NM_006022 | TGF beta-stimulated protein TSC-22                    |
| MRF2-hom                                       | 2.8                   | 3.7  | XM_058394 | modulator recognition factor 2 homolog                |
| KLF4                                           | 2.3                   | 3.0  | NM_004235 | Kruppel-like factor 4                                 |
| MYC                                            | -2.7                  | -2.8 | NM_002467 | v-myc myelocytomatosis viral oncogene homolog         |
| <b>Protease/protease Inhibitor</b>             |                       |      |           |                                                       |
| TMPPRS2                                        | 15.5                  | 18.3 | NM_005656 | transmembrane protease, serine 2                      |
| KLK2                                           | 8.8                   | 9.0  | NM_005551 | kallikrein 2, prostatic                               |
| KLK3                                           | 7.9                   | 10.2 | NM_001648 | kallikrein 3, prostate specific antigen               |
| KLK4                                           | 3.7                   | 4.6  | NM_004917 | kallikrein 4 (prostate, EMSP1)                        |
| CPD                                            | 2.6                   | 4.9  | NM_001304 | carboxypeptidase D                                    |
| SERPIN1                                        | -3.5                  | -2.1 | NM_005025 | serine (or cysteine) proteinase inhibitor             |
| <b>Signal transduction</b>                     |                       |      |           |                                                       |
| LIFR                                           | 7.8                   | 7.5  | NM_002310 | leukemia inhibitory factor receptor                   |
| IQGAP2                                         | 4.3                   | 6.8  | NM_006633 | IQ motif GTPase activating protein 2                  |
| AGM1                                           | 3.7                   | 4.2  | NM_015599 | N-acetylglucosamine-phosphate mutase                  |
| HOMER-2B                                       | 3.5                   | 3.3  | NM_004839 | neuronal immediate early gene, 2                      |
| AKAP12                                         | 3.5                   | 5.1  | NM_005100 | A kinase (PRKA) anchor protein (gravin) 12            |
| TPD52                                          | 3.5                   | 2.9  | NM_005079 | tumor protein D52                                     |
| LIM                                            | 3.5                   | 2.7  | NM_006457 | LIM protein                                           |
| CAMKK2                                         | 3.3                   | 1.9  | NM_006549 | ca/calmodulin kinase kinase 2, beta                   |
| PTPN21                                         | 3.0                   | 4.0  | NM_007039 | protein tyrosine phosphatase, type 21                 |
| GUCY1A3                                        | 2.9                   | 3.3  | NM_000856 | guanylate cyclase 1, soluble, alpha 3                 |
| INPP4B                                         | 2.3                   | 4.6  | NM_003866 | inositol polyphosphate-4-phosphatase, type II         |
| MERTK                                          | 2.3                   | 3.4  | Hs.117078 | c-mer proto-oncogene tyrosine kinase                  |
| AKAP2                                          | 1.7                   | 4.4  | NM_007203 | A kinase (PRKA) anchor protein 2                      |
| BCHE                                           | -3.0                  | -4.9 | NM_000055 | butyrylcholinesterase                                 |
| PRKCM                                          | -3.0                  | -2.5 | NM_002742 | protein kinase C, mu                                  |
| SDC4                                           | -3.1                  | -2.7 | NM_002999 | syndecan 4                                            |
| PEG3                                           | -3.2                  | -4.0 | Hs.139033 | paternally expressed 3                                |
| TUSP                                           | -3.5                  | -2.1 | NM_020245 | tubby super-family protein                            |
| PIK3R3                                         | -3.8                  | -3.6 | NM_003629 | phosphoinositide-3-kinase, regulatory subunit         |
| RDC1                                           | -7.8                  | -4.5 | XM_051522 | G protein-coupled receptor                            |
| <b>Structure/motility/adhesion</b>             |                       |      |           |                                                       |
| KRT8                                           | 5.0                   | 4.3  | NM_002273 | keratin 8                                             |
| ADRM1                                          | 3.7                   | 5.9  | NM_007002 | adhesion regulating molecule 1                        |
| ACTN1                                          | 3.6                   | 2.9  | NM_001102 | actinin, alpha 1                                      |
| ITGAV                                          | 3.1                   | 3.0  | NM_002210 | integrin, alpha V,CD51                                |
| KRT19                                          | 3.1                   | 3.6  | NM_002276 | keratin 19                                            |
| H1FO                                           | 2.9                   | 3.2  | NM_007234 | histone family, member 0                              |
| DCTN3                                          | 2.1                   | 3.4  | NM_005318 | dynactin 3                                            |
| MLCB                                           | 2.0                   | 3.2  | NM_006471 | myosin, light polypeptide, regulatory                 |
| MMP16                                          | -2.3                  | -3.3 | NM_005941 | matrix metalloproteinase 16                           |
| FN1                                            | -2.5                  | -4.4 | NM_002026 | fibronectin 1                                         |
| <b>Stress response</b>                         |                       |      |           |                                                       |
| ORM1                                           | 5.3                   | 8.1  | NM_000608 | orosomucoid 1                                         |
| SEPP1                                          | 4.9                   | 5.5  | NM_005410 | selenoprotein P, plasma, 1                            |
| GSR                                            | 4.5                   | 3.1  | NM_000637 | glutathione reductase                                 |
| SGK                                            | 4.4                   | 2.4  | NM_005627 | serum/glucocorticoid regulated kinase                 |
| SPAK                                           | 4.0                   | 4.9  | NM_013233 | Ste-20 related kinase                                 |
| DNAJB9                                         | 4.0                   | 3.6  | NM_012328 | DnaJ (Hsp40) homolog, subfamily B                     |
| <b>Other functions</b>                         |                       |      |           |                                                       |
| TMEPA1                                         | 9.2                   | 8.6  | NM_020182 | transmembrane, prostate androgen induced              |
| B2M                                            | 7.6                   | 7.8  | NM_004048 | beta-2-microglobulin                                  |
| TCRG/TARP                                      | 5.2                   | 5.5  | NM_030806 | T cell receptor gamma locus/ (TARP)                   |
| HERC3                                          | 5.1                   | 6.6  | NM_014606 | hect domain and RLD 3                                 |
| FLJ23153                                       | 5.0                   | 4.6  | NM_024636 | TNF-alpha-induced adipose-related (ortholog)          |
| ADAMTS                                         | 4.0                   | 2.6  | NM_006988 | disintegrin-like metalloprotease                      |
| HS1-2                                          | 3.7                   | 4.6  | NM_007011 | putative transmembrane protein                        |
| RBM10                                          | 3.3                   | 2.9  | NM_005676 | RNA binding motif protein 10                          |
| UAP1                                           | 3.0                   | 3.1  | NM_003115 | UDP-N-acetylglucosamine pyrophosphorylase             |
| ST7                                            | -2.7                  | -4.2 | NM_018412 | suppression of tumorigenicity 7                       |
| DPH2L1                                         | -3.0                  | -4.4 | NM_001383 | diphtheria toxin resistance protein like 1            |
